# Supplementary material for: Evaluating reporting and process quality of publications on UNHS: a systematic review of programmes
Source: PubMed Central journal article supplement (PMC4511235; doi:10.1186/s12887-015-0404-x), 2015-07-22
Supplement: 12887_2015_404_MOESM1_ESM.pdf [file 12887_2015_404_MOESM1_ESM.pdf]

**APPENDIX 1 - SEARCH STRATEGY – Medline via OVID**

1. exp child/
2. exp infant/
3. child\$.ti,ab,hw.
4. neonat\$.ti,ab,hw.
5. infant\$.ti,ab,hw.
6. (newborn\$ or (new adj1 born)).ti,ab,hw.
7. (paediatric\$ or pediatric\$).ti,ab,hw.
8. 1 or 2 or 3 or 4 or 5 or 6 or 7
9. exp hearing disorders/
10. exp hearing impaired persons/
11. (hearing adj (disorder\$ or loss\$ or impair\$)).ti,ab,hw.
12. hearing.ti,ab,hw.
13. (deaf\$4 or hearing NEAR loss\$2 or hearing NEAR disorder\$2 or paracus\$2 or dysacus\$2 or hearing NEAR impair\$4 or hearing NEAR problem\$1 or hearing NEAR defect\$3).ti,ab.
14. 9 or 10 or 11 or 12 or 13
15. exp Mass Screening/
16. exp Neonatal Screening/
17. screen\$3.ti,ab,hw.
18. 15 or 16 or 17
19. exp clinical trial/
20. exp research design/
21. exp treatment outcome/
22. exp double-blind method/

23. exp single-blind method/
24. exp comparative study/
25. ((single or double or triple) adj3 blind\$3).ti,ab,hw.
26. random\$.ti,ab,hw.
27. controlled clinical trial.pt.
28. practice guideline.pt.
29. clinical trial.pt.
30. (clinical adj trial\$1).ti,ab,hw.
31. (control\$3 adj trial\$1).ti,ab,hw.
32. randomi#ed controlled trial.pt.
33. pla#ebo\$.ti,ab,hw.
34. clinical trial.mp.
35. random\$.mp.
36. tu.xs.
37. 19 or 20 or 21 or 22 or 23 or 25 or 26 or 27 or 28 or 29 or 30 or 31 or 32 or 33 or 34 or 35 or 36
38. 8 and 14 and 18 and 37
39. limit 38 to (humans and yr="1990 -Current")
