# Supplementary material for: Evaluating reporting and process quality of publications on UNHS: a systematic review of programmes
Source: PubMed Central journal article supplement (PMC4511235; doi:10.1186/s12887-015-0404-x), 2015-07-22
Supplement: 12887_2015_404_MOESM5_ESM.pdf [file 12887_2015_404_MOESM5_ESM.pdf]

Table S3. Overreferral Performance Indicators

| ID | Source                           | # with hearing loss risk factors / # screened (%) | I5: Referral rate after discharge (% of screened)                                                                                                     | I5 within 5-20% (for OAE) or ≤4% (for ABR or OAE+ABR) [A, I, N.R.] | I6: Referral rate for definitive audiological evaluation after screening                                                                                         | I6 <4% [A, I, N.R.] | I7: False Positive Rate     | I7 ≤3% [A, I, N.R.] |
|----|----------------------------------|---------------------------------------------------|-------------------------------------------------------------------------------------------------------------------------------------------------------|--------------------------------------------------------------------|------------------------------------------------------------------------------------------------------------------------------------------------------------------|---------------------|-----------------------------|---------------------|
| 1  | Bevilacqua M, 2010 <sup>33</sup> | 1,284 / 11,466 (11.2%)                            | 2,546 / 11,466 (22.2%)                                                                                                                                | I – OAE                                                            | 382 / (11,466 – 519) (3.5%)                                                                                                                                      | A                   | 312 / (10,893 – 519) (3.0%) | A                   |
| 2  | Calevo M, 2007 <sup>34</sup>     | 462 / 32,306 (1.4%)                               | - without audiological risk factor: 3,012 / 31,796 (9.5%);<br>- at higher audiological risk: 510 / 510 (100.0%)<br>- globally: 3,522 / 32,306 (10.9%) | A – OAE                                                            | a) without audiological risk factor: 19 / (31,796 – 180) (0.06%) <sup>a</sup><br>b) at higher audiological risk: 22 / 462 (4.8%)<br>Globally: 41 / 32,258 (0.1%) | A                   | 0,28% (reported)            | A                   |
| 3  | Cebulla M, 2012 <sup>35</sup>    | N.R. / 6868 (N.R.%)                               | Well baby newborn: 261 / 6,868 (3.8%)                                                                                                                 | A - aABR                                                           | 188 / (6,868 - 2) (2.7%)                                                                                                                                         | A                   | 141 / (6,819 – 2) (2.1%)    | A                   |
| 4  | De Capua, 2007 <sup>36</sup>     | 1,344 / 19,700 (6.8%)                             | ≤2,893 / 19,700 (14.7%) <sup>b</sup>                                                                                                                  | A – OAE                                                            | 35 / (19,700 – 255) (0.2%)                                                                                                                                       | A                   | 0 / (19,665 – 255) (0.0%)   | A                   |
| 5  | Guastini L, 2010 <sup>37</sup>   | 264 / 8,671 (3.0%)                                | - without audiological risk factor: 430 / 8,407 (5.1%);<br>- at higher audiological risk: 264 / 264 (100.0%)<br>- globally: 694 / 8,671 (8,0%)        | A – OAE                                                            | 6 / (8,671 – 42) (0.07%)                                                                                                                                         | A                   | 0 / (8,665 – 42) (0.0%)     | A                   |

<sup>a</sup> 3 neonates with transient Hearing Loss resolved by month 12 have been included

<sup>b</sup> 2,893 is the sum of 1,549 positive at first TOAE and 1,344 High Risk (among which a number of neonates classified as *TOAE refer* were included); even for the worst case of no high risk neonate without OAE the benchmark would be achieved.

| ID | Source                        | # with hearing loss risk factors / # screened (%)                                                                   | I5: Referral rate after discharge (% of screened)                        | I5 within 5-20% (for OAE) or ≤4% (for ABR or OAE+ABR) [A, I, N.R.] | I6: Referral rate for definitive audiological evaluation after screening                                                               | I6 <4% [A, I, N.R.]    | I7: False Positive Rate                                                                       | I7 ≤3% [A, I, N.R.]    |
|----|-------------------------------|---------------------------------------------------------------------------------------------------------------------|--------------------------------------------------------------------------|--------------------------------------------------------------------|----------------------------------------------------------------------------------------------------------------------------------------|------------------------|-----------------------------------------------------------------------------------------------|------------------------|
| 6  | Habib H, 2005 <sup>38</sup>   | 0 / 11,986 (0%)                                                                                                     | without audiological risk factor: 300 / 11,986 (2.5%)                    | <b>N.R.</b> – OAE                                                  | 300 / 11,986 (2.5%)                                                                                                                    | A                      | 278 / 11,986 (2.3%)                                                                           | A                      |
| 7  | Kennedy C, 2005 <sup>39</sup> | 1,724 / 21,279 (8.1%)                                                                                               | N.R. / N.R. (2.5% at the start of the program. to 1.6% at a later stage) | <b>A</b> - OAE/ABR                                                 | N.R. / N.R. (2.5% at the start of the program. to 1.6% at a later stage)                                                               | A                      | 319 / 21,279 (1.5%)                                                                           | A                      |
| 8  | Korres S, 2008 <sup>40</sup>  | N.R. / 76,560 (N.R.)                                                                                                | 1,688 / 76,560 (2.2%)                                                    | <b>A</b> - OAE                                                     | 404 / (76,560 – 1,230) (0.5%)                                                                                                          | A                      | 99 / (75,330 – 1,230) (0.1%)                                                                  | A                      |
| 9  | Lin H, 2007 <sup>41</sup>     | Three Protocols used (see Tab 2):<br>a) N.R. / 18,260 (N.R.);<br>b) N.R. / 3,540 (N.R.);<br>c) N.R. / 3,788 (N.R.); | a) 5.8% (2-3 tests);<br>b) 1.6% (2 tests);<br>c) 0.8% (2 tests)          | a) <b>A</b> - OAE;<br>b) <b>A</b> – OAE/ABR;<br>c) <b>A</b> - ABR  | Three protocols used (see Table 2):<br>a) 1,055 / (18,260 – 196) (5.8%);<br>b) 57 / (3,540 – 17) (1.6%);<br>c) 31 / (3,788 – 3) (0.8%) | a) I;<br>b) A;<br>c) A | a) 776 / (18,064 – 196) (4.3%);<br>b) 31 / (3,523 – 17) (0.9%);<br>c) 12 / (3,785 – 3) (0.3%) | a) I;<br>b) A;<br>c) A |
| 10 | Rohlf AK, 2010 <sup>42</sup>  | N.R. / 60,782 (N.R.)                                                                                                | 1,963 / 60,782 (3,2%)                                                    | <b>A</b> - ABR                                                     | 217 / (60,782 - 701) (0.4%)                                                                                                            | A                      | 33 / (60,664 – 701) (0.05%)                                                                   | A                      |
| 11 | Tatli MM, 2007 <sup>43</sup>  | N.R. / 711 (N.R.) <sup>c</sup>                                                                                      | N.R. / N.R. (N.R.)                                                       | <b>N.R.</b> - OAE                                                  | 5 / (711 – 6) (0.7%)                                                                                                                   | A                      | 0.3% reported by the authors                                                                  | A                      |

<sup>c</sup> Authors report that 236 out of 711 (33.2%) are from NICU

| ID | Source                         | # with hearing loss risk factors / # screened (%)                     | 15: Referral rate after discharge (% of screened) | 15 within 5-20% (for OAE) or ≤4% (for ABR or OAE+ABR) [A, I, N.R.] | 16: Referral rate for definitive audiological evaluation after screening | 16 <4% [A, I, N.R.] | 17: False Positive Rate | 17 ≤3% [A, I, N.R.] |
|----|--------------------------------|-----------------------------------------------------------------------|---------------------------------------------------|--------------------------------------------------------------------|--------------------------------------------------------------------------|---------------------|-------------------------|---------------------|
| 12 | Tsuchiya H, 2006 <sup>44</sup> | N.R. / 8,979 (high risk neonates needing intensive care not included) | 37 / 8,979 (0.4%)                                 | N.R. - ABR                                                         | 31 / (8,979 – 1) (0.3%)                                                  | A                   | 6 / (8,978 – 1) (0.07%) | A                   |
